# Supplementary material for: Ligase chain reaction-based electrochemical biosensor for the ultrasensitive and specific detection of single nucleotide polymorphisms
Source: Royal Society of Chemistry journal article supplement (doi:10.1039/c9nj03994e), 2019-01-01
Supplement: c9nj03994e1.pdf [file c9nj03994e1.pdf]

## Supplementary Material

### **Ligase chain reaction-based electrochemical biosensor for the ultrasensitive and specific detection of single nucleotide polymorphisms**

Wancun Zhang<sup>a,1</sup>, Fang Hu<sup>b,c,1</sup>, Xianwei Zhang<sup>a,1</sup>, Wei Meng<sup>c</sup>, Yaodong Zhang<sup>a</sup>, Yinsen Song<sup>a</sup>, Huanmin Wang<sup>d</sup>, Peng Wang<sup>b,\*</sup>, Yueqing Gu<sup>b,\*</sup>

<sup>a</sup> Children's Hospital affiliated of Zhengzhou University, 450000 Zhenzhou, China

<sup>b</sup> State Key Laboratory of Natural Medicines, Department of Biomedical Engineering, School of Engineering, China Pharmaceutical University, 210009 Nanjing, China

<sup>c</sup> Key Laboratory of Biomedical Functional Materials, School of Science, China Pharmaceutical University, Nanjing 211198, China

<sup>d</sup> Beijing Children's Hospital, 100045 Beijing, China

\* Corresponding author E-mail addresses: guengineering@cpu.edu.cn (Y. Gu); wangpeng@cpu.edu.cn (P. Wang).

<sup>1</sup> These authors contributed equally to this work

**Table S1 Sequences of the oligonucleotides in this work.**

| Name          | Sequence (5' – 3')                         |
|---------------|--------------------------------------------|
| WtDNA         | CCTCCACCGTGCAGCTCATCACGCAGCTCATGCCCTTCGGC  |
| MutDNA        | CCTCCACCGTGCAGCTCATCATGCAGCTCATGCCCTTCGGC  |
| Probe A       | P-TGATGAGCTGCACGGT                         |
| Probe A'      | GACTACATAAGCTGGCGTTGG ACCGTGCAGCTCATCA     |
| Probe B-mut   | AGGGCATGAGCTGCA                            |
| Probe B'-mut  | P-TGCAGCTCATGCCCT GGATGTCAGTCTGTCTCGTGG    |
| Probe B-wt    | AGGGCATGAGCTGCG                            |
| Probe B'-wt   | P-CGCAGCTCATGCCCT GGATGTCAGTCTGTCTCGTGG    |
| SP-DNA        | CCAACGCCAGCTTATGTAGTCAAAAA-NH <sub>2</sub> |
| Stem-loop DNA | CCAACGCCACGAGACAGACTGACATCCCGTTGG          |

Note: probe A and probe A' are universal for MutDNA and WtDNA LCR-based electrochemical biosensor.

### Functional modifications of GCE

Before modification, the bare GCE was polished thoroughly with 1.0, 0.3, and 0.05  $\mu\text{m}$  alumina slurry and rinsed with distilled water. The GCE was then ultrasonically cleaned in ethanol, water, and acetone sequentially for 5 min. Finally, the GCE electrode was dried using N<sub>2</sub> at RT.

Afterwards, 4 mg of cMWCNTs were dispersed in 1 mL of DMF (4 mg·mL<sup>-1</sup>) and sonicated for 60 min to form a black and well-dispersed suspension. Next, 10  $\mu\text{L}$  of the cMWCNTs suspension was drop-coated onto the surface of the polished bare GCE and subsequently dried at RT (cMWCNTs/GCE). Then, 10  $\mu\text{L}$  of EDC/NHS solution was dropped onto the surface of the cMWCNTs/GCE for 2 h to activate the carboxyl groups of cMWCNTs. Subsequently, the modified and activated cMWCNTs/GCE was immersed in capture probe SP-DNA solution (10  $\mu\text{M}$ ) for 2 h at RT to immobilize the probe via amide bonds (SP-DNA/cMWCNTs/GCE). Before the electrochemical measurements, the electrode was rinsed with purified water to eliminate nonspecific adsorption and stored in N<sub>2</sub> atmosphere at 4 °C.

### The relationship between peak current and scanning rate

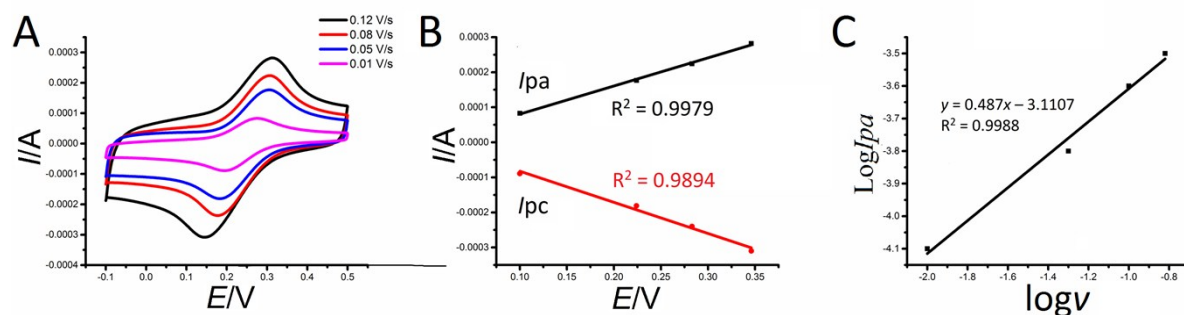

**Fig. S1** (A) CV curves of SP-DNA/cMWCNTs/GCE at different scan rates in the range of 0.01 ~ 0.12 V/s. (B) linear calibration plots for the peak current versus square root of scan rate. (C) linear calibration plots for the logarithm of peak current versus logarithm of scan rate.

### Optimization the concentration of SP-DNA

The concentration of the SP-DNA immobilized on the surface of the cMWCNTs/GCE was evaluated. As shown in Fig. S1, the peak current values of the SP-DNA/cMWCNTs/GCE slightly decreased with increasing SP-DNA concentrations (from 0  $\mu$ M to 10  $\mu$ M) and reached a stable electrochemical signal at 10  $\mu$ M, demonstrating that the carboxyl groups of cMWCNTs modified on the surface of the bare GCE were almost completely bound to SP-DNA at 10  $\mu$ M. Moreover, we investigated the electrochemical response of the SL-DS-DNA/cMWCNTs/GCE changed with SP-DNA concentrations, when the concentration of MutDNA is 0.1 fM in LCR. The electrochemical signal fell to its lowest value at 10  $\mu$ M, and slightly increased at higher concentrations due to steric effect. Therefore, the optimal concentration of SP-DNA was observed to be 10  $\mu$ M.

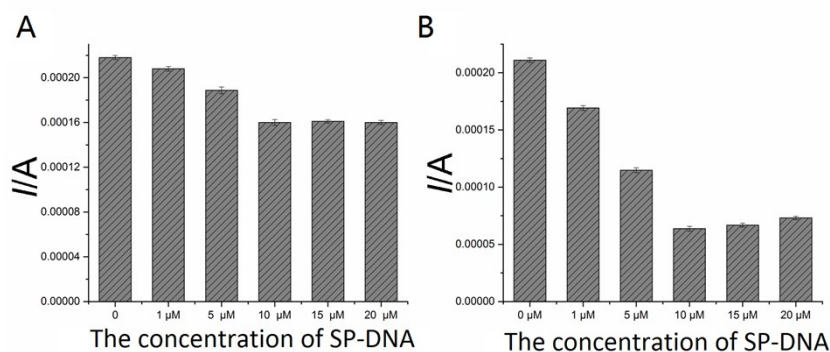

**Fig. S2** Dependence of the peak currents on the concentrations of SP-DNA (A) in the absence and (B) presence of the products of LCR (0.1 fM Mut DNA). Error bars show the standard deviation of three experiments.

### The repeatability and reproducibility of MutDNA LCR-based electrochemical biosensor

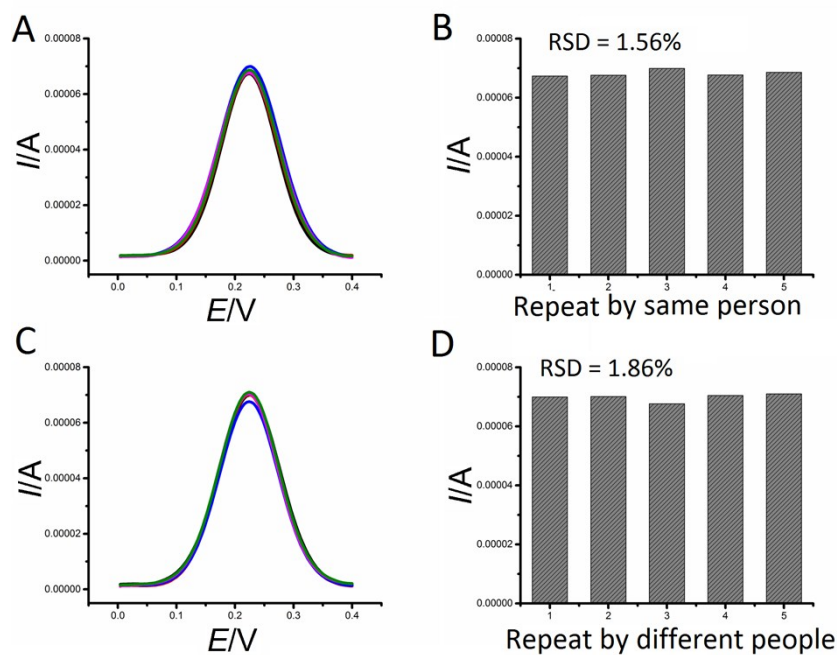

**Fig. S3** (A) The DPV curves of developed MutDNA LCR-based electrochemical biosensor obtained by the same person, (B) histogram of DPV peak current in (A). (C) The DPV curves of developed MutDNA LCR-based electrochemical biosensor obtained by five persons, (D) histogram of DPV peak current in (C).

## The repeatability and reproducibility of WtDNA LCR-based electrochemical biosensor

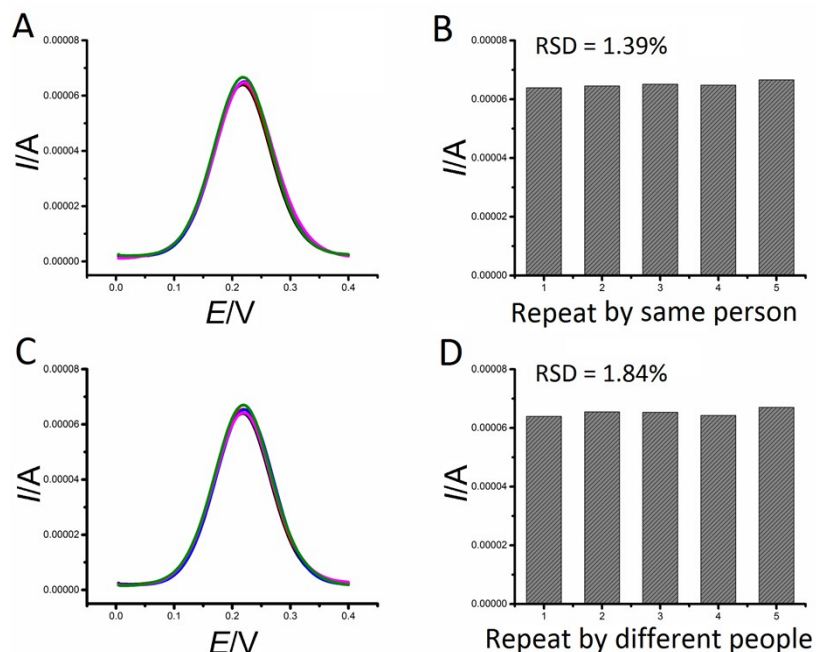

**Fig. S4** (A) The DPV curves of developed WtDNA LCR-based electrochemical biosensor obtained by the same person, (B) histogram of DPV peak current in (A). (C) The DPV curves of developed WtDNA LCR-based electrochemical biosensor obtained by five persons, (D) histogram of DPV peak current in (C).

## The influence of different modified electrodes to WtDNA LCR-based electrochemical biosensor

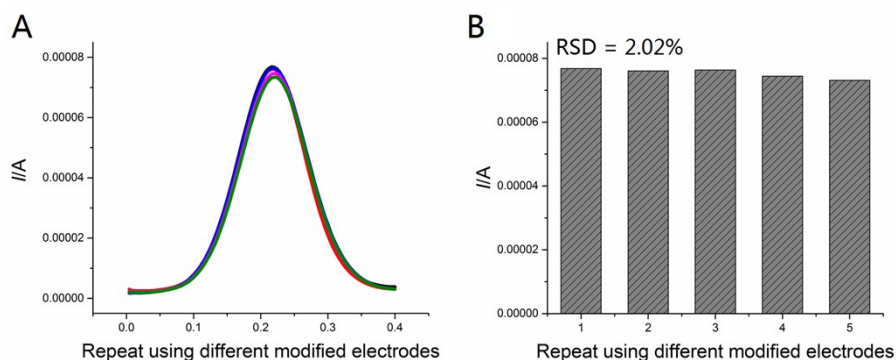

**Fig. S5** (A) The DPV curves of developed WtDNA LCR-based electrochemical biosensor obtained by different modified electrodes, (B) histogram of DPV peak current in (A).

**Table S2 The LOD, linear range, specificity, reproducibility and stability of various methods for SNPs.**

| Approaches           | LOD     | Linear range    | Specificity | Reproducibility <sup>a</sup> | Stability <sup>a</sup> | Reference |
|----------------------|---------|-----------------|-------------|------------------------------|------------------------|-----------|
| MNP-enzyme           | 50 fM   | 5 pM to 200 nM  | 10%         | —                            | —                      | 1         |
| ligation-LCR         | 0.1 nM  | 1 nM to 0.6 pM  | 0.05%       | general                      | general                | 2         |
| encoded probes       | 25 fmol | 500 pM to 10 nM | 0.5%        | —                            | —                      | 3         |
| LCR-CCPs             | 1 fM    | 1 fM to 10 pM   | 1.0%        | —                            | —                      | 4         |
| LCR-CRET             | 0.86 fM | 1 fM to 10 pM   | 0.01%       | —                            | —                      | 5         |
| Real-time LCR        | 10 aM   | 10 aM to 1 pM   | 0.1%        | —                            | —                      | 6         |
| Electrochemistry-LCR | 1.18 aM | 10 aM to 10 pM  | 0.1%        | good                         | good                   | This work |

“—”: The proper data was not provided.

<sup>a</sup> “General” and “good” represent the reproducibility and stability of the SNPs detection approach is general or good.

**TableS3 The accuracy of the developed LCR-based electrochemical biosensor (n = 3).**

| Biosensor        | Added (fmol) | found (fmol) | Recovery (%) | RSD (%) |
|------------------|--------------|--------------|--------------|---------|
| MutDNA biosensor | 50           | 47.9         | 95.8         | 2.9     |
|                  | 200          | 192.8        | 96.4         | 1.7     |
| WtDNA biosensor  | 50           | 51.7         | 103.4        | 3.2     |
|                  | 200          | 196.8        | 98.4         | 2.1     |

## Reference

1. Y. Zhang, C. Pilapong, Y. Guo, Z. Ling, O. Cespedes, P. Quirke and D. Zhou, *Anal. Chem.*, 2013, **85**, 9238-9244.
2. S. Zhang, Z. Wu, G. Shen and R. Yu, *Biosens. Bioelectron.*, 2009, **24**, 3201-3207.
3. Q. Zhou, F. Yuan, X. Zhang, Y. Zhou and X. Zhang, *Chem. Sci.*, 2018, **9**, 3335-3340.
4. Y. Cheng, Q. Du, L. Wang, H. Jia and Z. Li, *Anal. Chem.*, 2012, **84**, 3739-3744.
5. S. Bi, Z. Zhang, Y. Dong and Z. Wang, *Biosens. Bioelectron.*, 2015, **65**, 139-144.
6. Y. Sun, X. Lu, F. Su, L. Wang, C. Liu, X. Duan and Z. Li, *Biosens. Bioelectron.*, 2015, **74**, 705-710.
